# Supplementary material for: A Structural Approach to the Strength Evaluation of Linear Chalcogen Bonds
Source: MDPI journal article supplement (doi:10.3390/molecules28073133), 2023-03-31
Supplement: s1 [file s1]

## SUPPLEMENTARY MATERIAL

### A structural approach to the strength evaluation of linear chalcogen bonds

M. Carla Aragoni <sup>1\*</sup>, Massimiliano Arca <sup>1</sup>, Vito Lippolis <sup>1</sup>, Anna Pintus <sup>1</sup>, Yury Torubaev <sup>2</sup>, Enrico Podda <sup>1,3</sup>

<sup>1</sup> Dipartimento di Scienze Chimiche e Geologiche, Cittadella Universitaria Monserrato, SS. 554 – bivio Sestu, 09042 Monserrato, Cagliari, Italy

<sup>2</sup> Department of Chemistry, Ben-Gurion University of the Negev, 84105 Beer-Sheva, Israel

<sup>3</sup> Centro Servizi di Ateneo per la Ricerca, Università degli Studi di Cagliari, Cittadella Universitaria, S.S. 554 bivio Sestu, 09042 Monserrato, Cagliari, Italy.

\*Correspondence: aragoni@unica.it

### Table of Contents

**Scheme S1:** Perturbation molecular orbital scheme showing the  $\sigma$ -interaction between the ChB acceptor A and the  $\sigma^*_{R-Ch}$  orbital of the ChB donor fragment. S2

**Figure S1:** Scatterplot of the  $d_{Ch\cdots A}$  vs  $d_{C-Ch}$  distances within the fragments  $C-Ch\cdots A$ . S3

**Figure S2:** Scatterplot of the  $d_{Ch\cdots A}$  vs  $d_{C-Ch}$  values calculated for the fragments  $C-S\cdots A$ . S4

**Figure S3:** Scatterplot of  $d_{Se\cdots A}$  vs  $d_{R-Se}$  distances within the fragments  $R-Se\cdots A$ . S5

**Figure S4:** Scatterplot of the  $d_{Te\cdots A}$  vs  $d_{R-Te}$  distances within the fragments  $R-Te\cdots A$ . S5

**Table S1:** Occurrence of the linear 27763 fragments  $R-S\cdots A$  featuring a ChB sorted by the nature of the involved atoms. S6

**Table S2:** Occurrence of the linear 4109 fragments  $R-Se\cdots A$  featuring a ChB sorted by the nature of the involved atoms. S6

**Table S3:** Occurrence of the linear 2318 fragments  $R-Te\cdots A$  featuring a ChB sorted by the nature of the involved atoms. S7

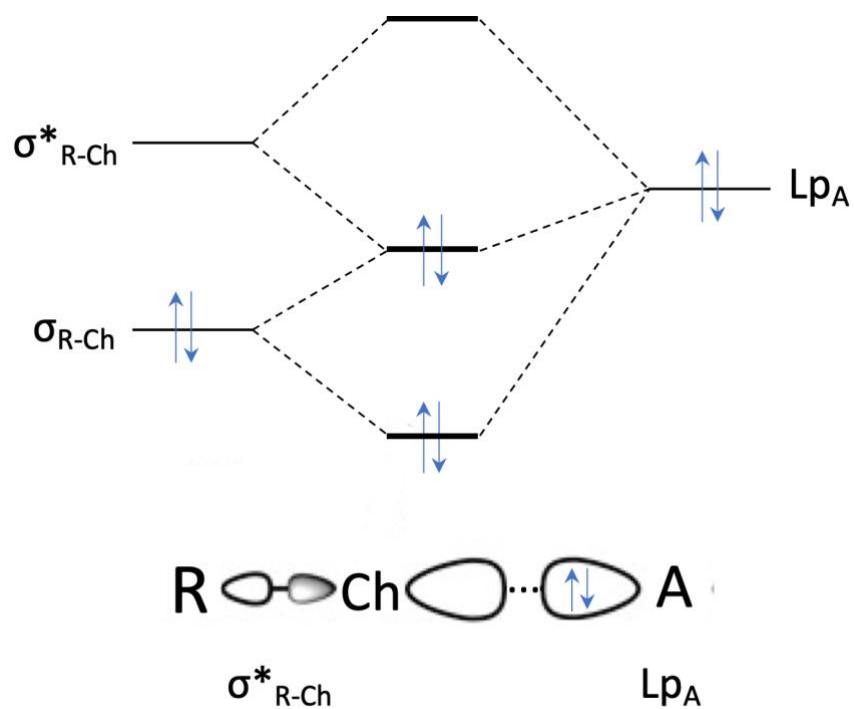

**Scheme S1:** Perturbation molecular orbital scheme showing the  $\sigma$ -interaction between the ChB acceptor A and the  $\sigma^*_{\text{R-Ch}}$  orbital of the ChB donor fragment.

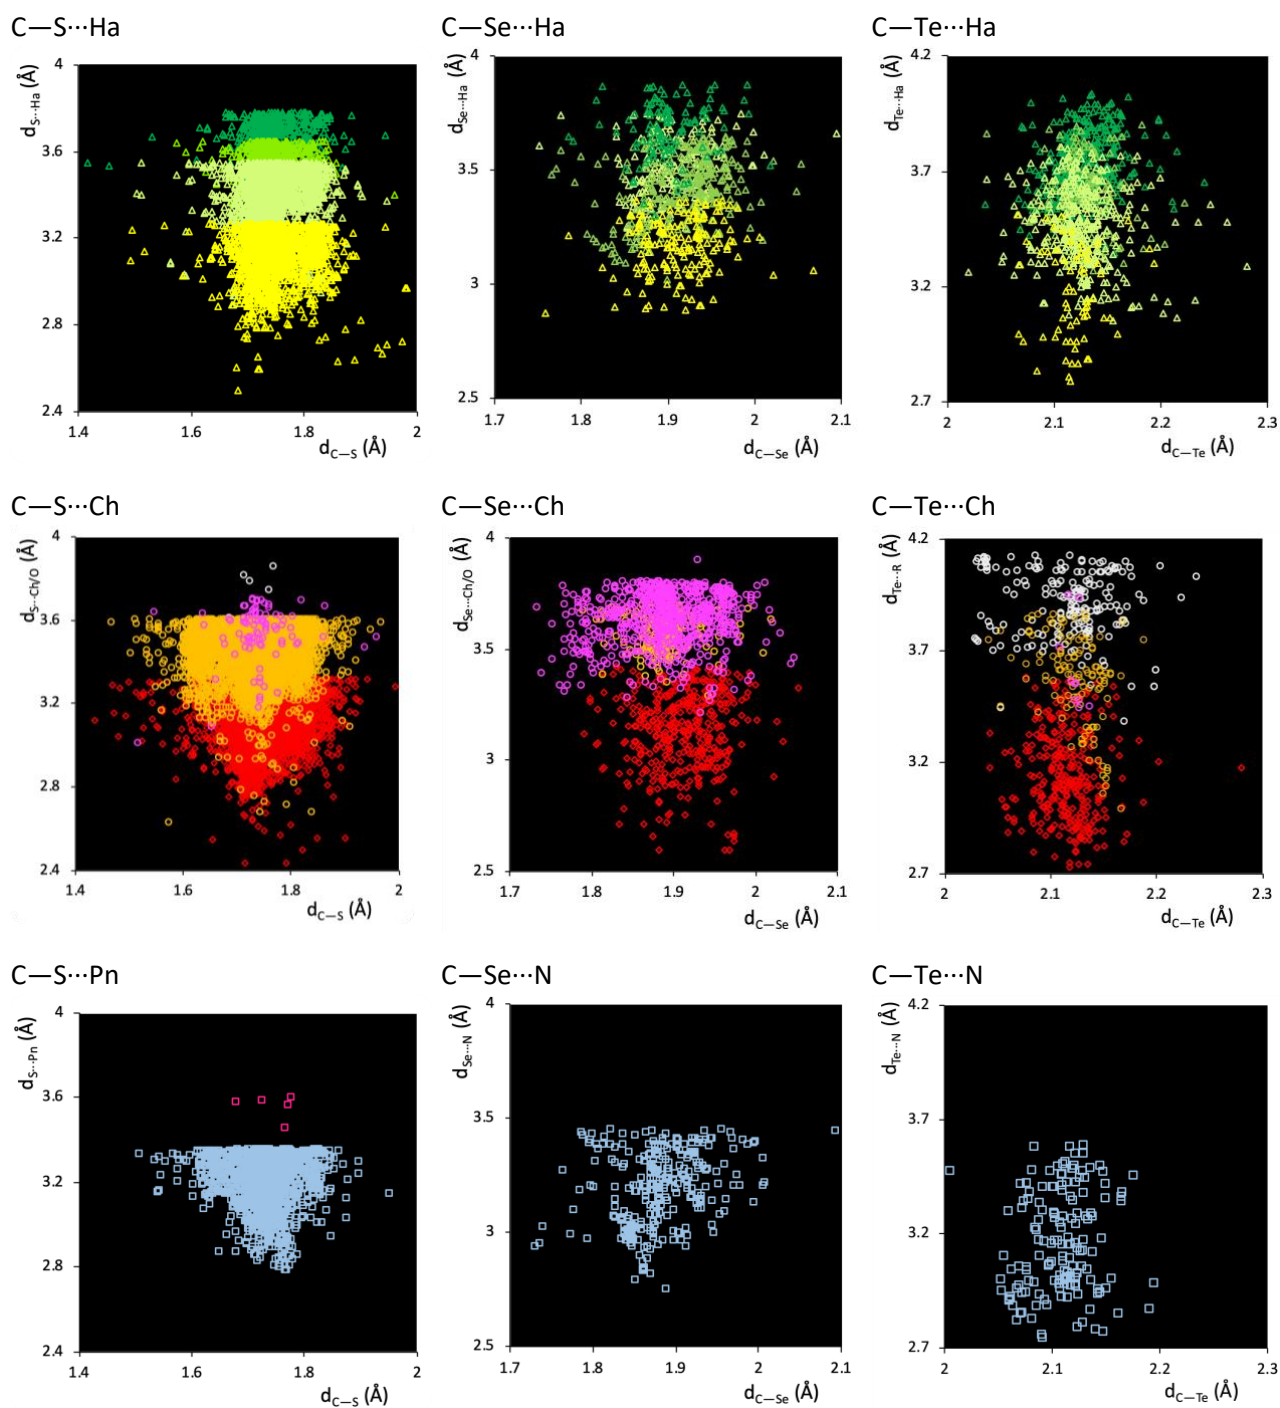

**Figure S1:** Scatterplot of the  $d_{Ch\cdots A}$  vs  $d_{C\cdots Ch}$  distances within the fragments  $C\cdots Ch\cdots A$ . A = Ha [triangles: F (lemon yellow), Cl (light green), Br (apple green), I (dark green)]; Ch/O [Ch = circles: S (yellow), Se (magenta), Te (white); O = rhombs (red)]; Pn [squares: N (light blue) P (purple)].

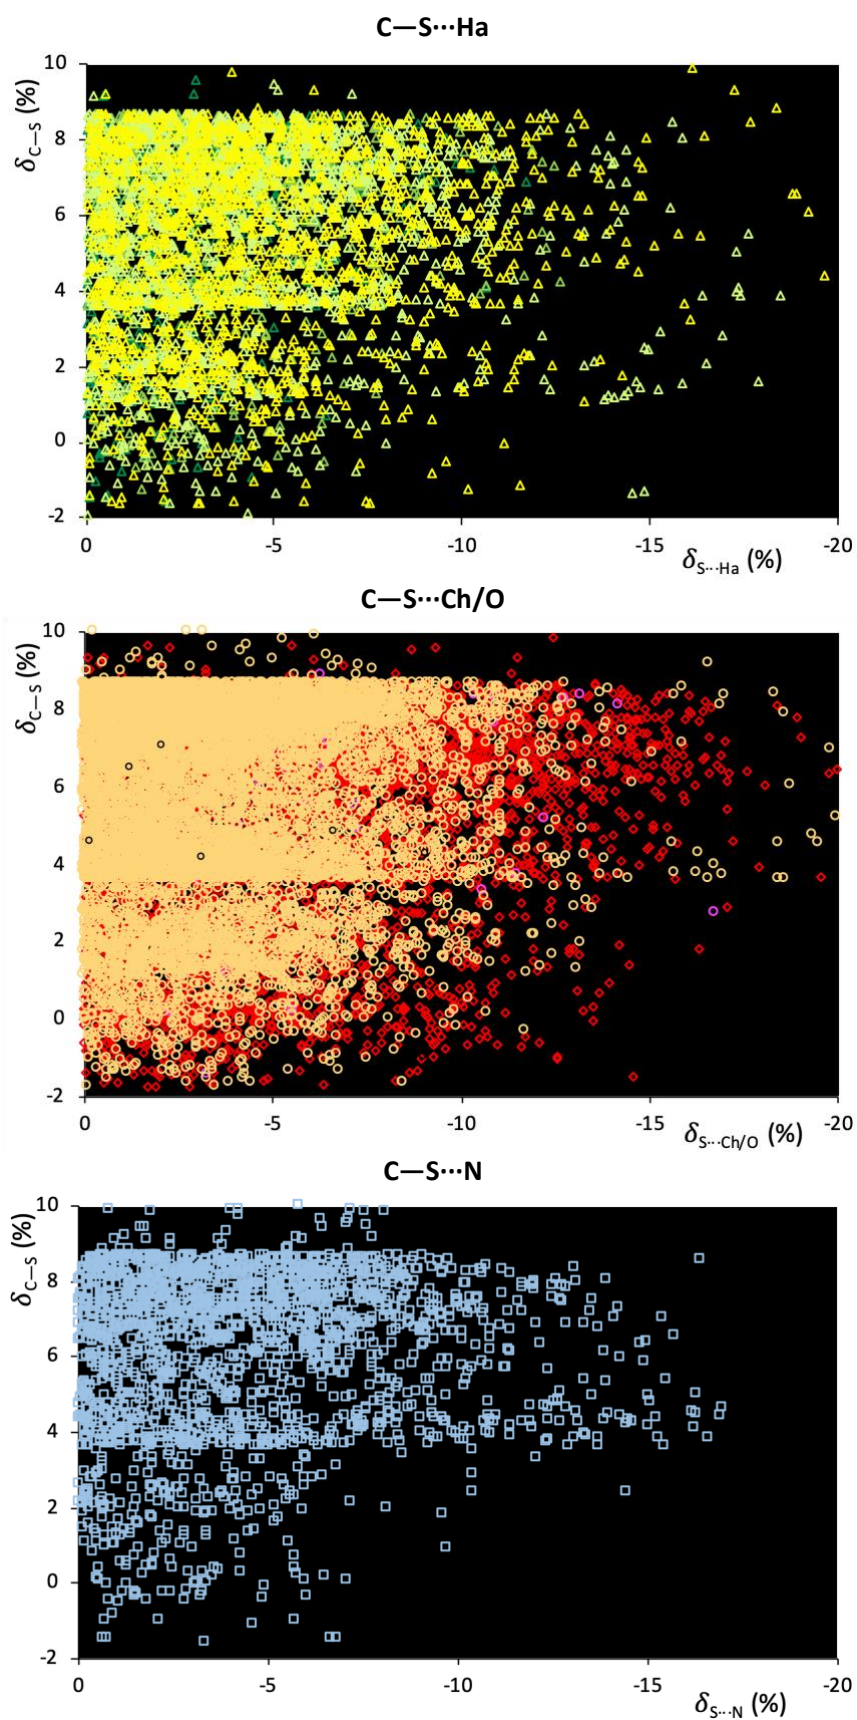

**Figure S2:** Scatterplots of the  $d_{Ch...A}$  vs  $d_{C-Ch}$  values calculated for the fragments C—S...A. A = Ha [triangles: F (lemon yellow), Cl (light green), Br (apple green), I (dark green)]; Ch/O [Ch = circles: S (yellow), Se (magenta), Te (white); O = rhombs (red)]; N (light blue squares).

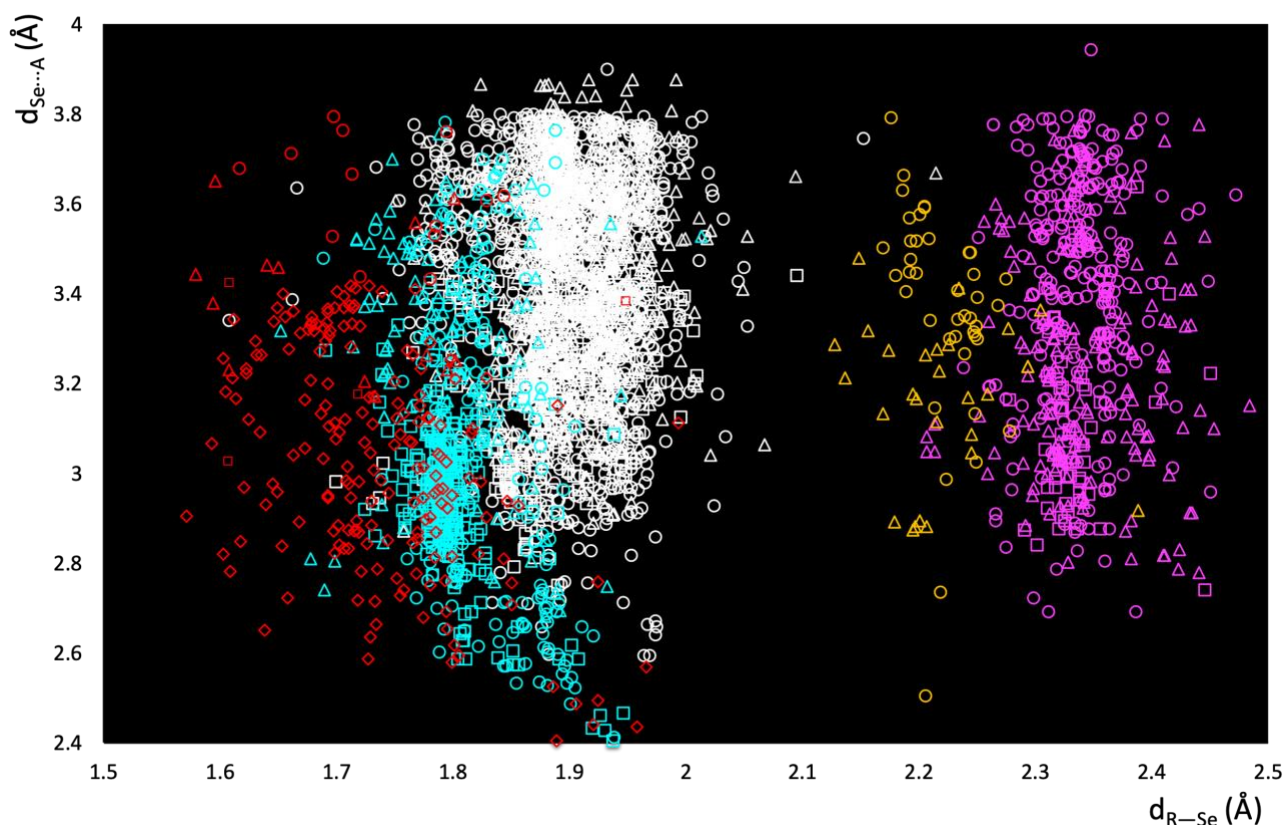

**Figure S3:** Scatterplot of  $d_{\text{Se}\cdots\text{A}}$  vs  $d_{\text{R-Se}}$  distances within the fragments  $\text{R-Se}\cdots\text{A}$ . R = C (white), O (red), N (cyan), S (yellow); Se (magenta); A = N (square), Ch (circle), O (rhombus), Ha (triangle).

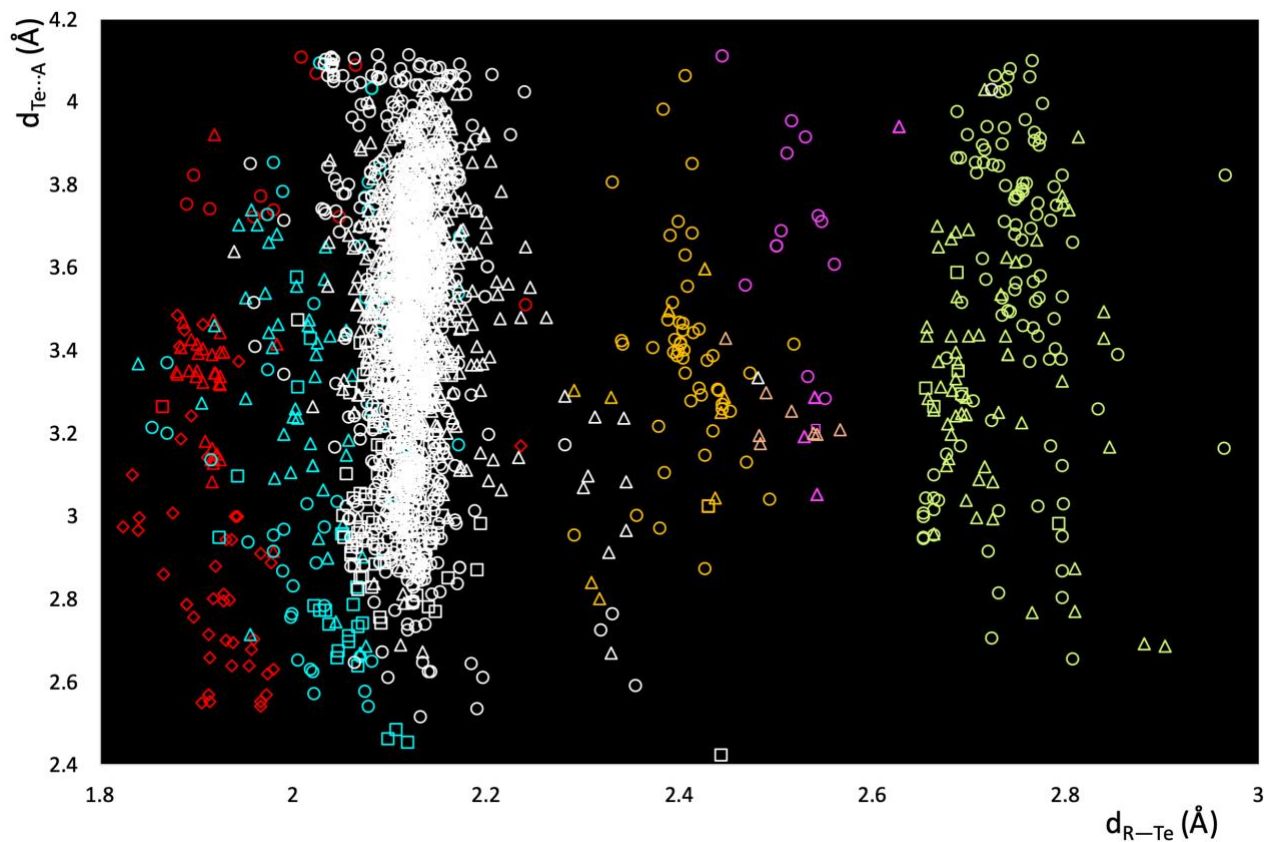

**Figure S4:** Scatterplot of the  $d_{\text{Te}\cdots\text{A}}$  vs  $d_{\text{R-Te}}$  distances within the fragments  $\text{R-Te}\cdots\text{A}$ . R = C (white), O (red), N (cyan), S (yellow); Te (acid green). A = N (square), Ch (circle), O (rhomb), Ha (triangle).



**Table S1:** Occurrence of the linear 27763 fragments R–S...A featuring a ChB sorted by the nature of the involved atoms. R = B, C, Si, N, P, As, Sb, O, S, Se, Te, F, Cl, Br, and I; A = N, P, As, Sb, O, S, Se, Te, F, Cl, Br, and I.

| R–S...A | N    | P | As | Sb | O    | S    | Se | Te | F    | Cl   | Br  | I   |
|---------|------|---|----|----|------|------|----|----|------|------|-----|-----|
| B       | 0    | 0 | 0  | 0  | 5    | 2    | 0  | 0  | 6    | 9    | 0   | 0   |
| C       | 1975 | 5 | 0  | 1  | 6537 | 8784 | 87 | 9  | 1511 | 1871 | 661 | 552 |
| Si      | 4    | 0 | 0  | 0  | 0    | 1    | 0  | 0  | 0    | 0    | 0   | 0   |
| N       | 1116 | 0 | 0  | 0  | 363  | 341  | 3  | 0  | 244  | 297  | 27  | 35  |
| P       | 6    | 1 | 0  | 0  | 17   | 163  | 2  | 1  | 12   | 23   | 5   | 1   |
| As      | 0    | 0 | 12 | 0  | 1    | 24   | 0  | 0  | 1    | 12   | 0   | 1   |
| Sb      | 11   | 0 | 0  | 91 | 0    | 32   | 0  | 0  | 0    | 3    | 0   | 0   |
| O       | 36   | 0 | 0  | 0  | 836  | 29   | 2  | 2  | 71   | 101  | 18  | 6   |
| S       | 180  | 0 | 0  | 0  | 199  | 642  | 4  | 0  | 145  | 177  | 186 | 69  |
| Se      | 5    | 0 | 0  | 0  | 1    | 2    | 8  | 0  | 0    | 12   | 12  | 1   |
| Te      | 0    | 0 | 0  | 0  | 1    | 6    | 1  | 4  | 1    | 3    | 3   | 2   |
| F       | 13   | 0 | 0  | 0  | 22   | 0    | 0  | 0  | 59   | 0    | 0   | 0   |
| Cl      | 2    | 0 | 0  | 0  | 4    | 1    | 0  | 0  | 10   | 11   | 0   | 0   |
| Br      | 0    | 0 | 0  | 0  | 0    | 0    | 0  | 0  | 1    | 0    | 6   | 0   |
| I       | 0    | 0 | 0  | 0  | 0    | 1    | 0  | 0  | 0    | 0    | 1   | 2   |

**Table S2:** Occurrence of the linear 4109 fragments R–Se...A featuring a ChB sorted by the nature of the involved atoms. R = B, C, Si, N, P, As, Sb, O, S, Se, Te, F, Cl, Br, and I; A = N, P, As, Sb, O, S, Se, Te, F, Cl, Br, and I.

| R–Se...A | N   | P | As | Sb | O   | S   | Se  | Te | F   | Cl  | Br  | I   |
|----------|-----|---|----|----|-----|-----|-----|----|-----|-----|-----|-----|
| B        | 0   | 0 | 0  | 0  | 0   | 0   | 1   | 0  | 0   | 0   | 1   | 0   |
| C        | 272 | 1 | 0  | 0  | 424 | 186 | 718 | 1  | 171 | 292 | 182 | 116 |
| Si       | 0   | 0 | 0  | 0  | 0   | 0   | 1   | 0  | 0   | 0   | 0   | 0   |
| N        | 253 | 0 | 0  | 0  | 118 | 11  | 57  | 0  | 28  | 70  | 13  | 23  |
| P        | 1   | 9 | 0  | 0  | 9   | 4   | 141 | 1  | 9   | 15  | 5   | 21  |
| As       | 3   | 0 | 3  | 0  | 1   | 0   | 11  | 0  | 0   | 0   | 0   | 0   |
| Sb       | 6   | 0 | 0  | 1  | 0   | 0   | 4   | 0  | 0   | 0   | 0   | 0   |
| O        | 4   | 0 | 0  | 0  | 189 | 0   | 13  | 0  | 0   | 13  | 0   | 1   |
| S        | 28  | 0 | 0  | 0  | 5   | 20  | 16  | 0  | 0   | 19  | 5   | 4   |
| Se       | 54  | 1 | 1  | 0  | 44  | 26  | 209 | 1  | 41  | 46  | 48  | 33  |
| Te       | 0   | 0 | 0  | 0  | 0   | 0   | 1   | 3  | 2   | 3   | 2   | 1   |
| F        | 0   | 0 | 0  | 0  | 0   | 0   | 0   | 0  | 2   | 0   | 0   | 0   |
| Cl       | 5   | 0 | 0  | 0  | 6   | 0   | 2   | 0  | 23  | 32  | 0   | 0   |
| Br       | 0   | 0 | 0  | 0  | 0   | 0   | 1   | 0  | 0   | 0   | 16  | 0   |
| I        | 0   | 0 | 0  | 0  | 0   | 0   | 1   | 0  | 0   | 1   | 0   | 4   |

**Table S3:** Occurrence of the linear 2318 fragments R–Te···A featuring a ChB sorted by the nature of the involved atoms.  
R = B, C, Si, N, P, As, Sb, O, S, Se, Te, F, Cl, Br, and I; A = N, P, As, Sb, O, S, Se, Te, F, Cl, Br, and I.

| R–Te···A | N   | P | As | Sb | O   | S   | Se | Te  | F  | Cl  | Br  | I   |
|----------|-----|---|----|----|-----|-----|----|-----|----|-----|-----|-----|
| B        | 0   | 0 | 0  | 0  | 1   | 0   | 0  | 0   | 3  | 0   | 0   | 1   |
| C        | 155 | 1 | 0  | 0  | 332 | 127 | 10 | 185 | 66 | 352 | 165 | 376 |
| Si       | 0   | 0 | 0  | 0  | 0   | 0   | 0  | 1   | 0  | 0   | 0   | 0   |
| N        | 28  | 0 | 0  | 0  | 28  | 14  | 0  | 2   | 13 | 23  | 3   | 9   |
| P        | 0   | 2 | 0  | 0  | 3   | 2   | 0  | 9   | 0  | 3   | 4   | 5   |
| As       | 0   | 0 | 0  | 0  | 3   | 1   | 0  | 0   | 0  | 0   | 0   | 0   |
| Sb       | 0   | 0 | 0  | 2  | 0   | 0   | 0  | 0   | 0  | 0   | 0   | 0   |
| O        | 1   | 0 | 0  | 0  | 50  | 7   | 0  | 7   | 0  | 4   | 8   | 21  |
| S        | 1   | 0 | 0  | 0  | 5   | 38  | 0  | 7   | 4  | 2   | 3   | 8   |
| Se       | 1   | 0 | 0  | 0  | 0   | 1   | 3  | 8   | 1  | 1   | 1   | 1   |
| Te       | 6   | 0 | 0  | 1  | 34  | 4   | 0  | 67  | 20 | 13  | 10  | 17  |
| F        | 0   | 0 | 0  | 0  | 0   | 0   | 0  | 0   | 0  | 0   | 0   | 0   |
| Cl       | 1   | 0 | 0  | 0  | 3   | 0   | 0  | 1   | 1  | 9   | 0   | 0   |
| Br       | 0   | 0 | 0  | 0  | 1   | 0   | 0  | 0   | 2  | 0   | 16  | 0   |
| I        | 0   | 0 | 0  | 0  | 0   | 0   | 0  | 0   | 1  | 3   | 0   | 12  |
